# Supplementary material for: Increased clonal hematopoiesis involving DNA damage response genes in patients undergoing lung transplantation
Source: PubMed Central journal article supplement (PMC10132147; doi:10.1172/jci.insight.165609), 2023-04-10
Supplement: jciinsight-8-165609-s144.pdf [file jciinsight-8-165609-s144.pdf]

## Supplementary Materials

### Table of Contents

Table S1: Genes included on Custom CH Gene Panel

Table S2: CH Variant Details

Table S3: Lung Transplant Recipient Clinical Characteristics by CH Status

Table S4: Genes Reviewed on Whole Exome Sequencing

Table S5: Potentially Pathogenic Germline Variants

Table S1: Genes Included on Custom CH Gene Panel

|               |               |                |               |               |               |
|---------------|---------------|----------------|---------------|---------------|---------------|
| <i>ASXL1</i>  | <i>ATM</i>    | <i>ATRX</i>    | <i>BCOR</i>   | <i>BCORL1</i> | <i>BRCC3</i>  |
| <i>BUB1B</i>  | <i>CBL</i>    | <i>CEBPA</i>   | <i>CEBPB</i>  | <i>CREBBP</i> | <i>CSF3R</i>  |
| <i>CUX1</i>   | <i>CXCL12</i> | <i>CXCR2</i>   | <i>CXCR4</i>  | <i>DNMT3A</i> | <i>EPO</i>    |
| <i>EZH2</i>   | <i>FLT3</i>   | <i>GNAS</i>    | <i>GNB1</i>   | <i>HBB</i>    | <i>IDH1</i>   |
| <i>IDH2</i>   | <i>IL17RA</i> | <i>JAK2</i>    | <i>KDM6A</i>  | <i>KRAS</i>   | <i>LUC7L2</i> |
| <i>MYD88</i>  | <i>NPM1</i>   | <i>NRAS</i>    | <i>PHF6</i>   | <i>PKLR</i>   | <i>PPM1D</i>  |
| <i>PTPN11</i> | <i>RAD21</i>  | <i>RUNX1</i>   | <i>SETBP1</i> | <i>SETD2</i>  | <i>SF1</i>    |
| <i>SF3B1</i>  | <i>SH2B3</i>  | <i>SMARCD2</i> | <i>SMC1A</i>  | <i>SMC3</i>   | <i>SRCAP</i>  |
| <i>SRSF2</i>  | <i>STAG2</i>  | <i>STAT3</i>   | <i>TET2</i>   | <i>TFR2</i>   | <i>TP53</i>   |
| <i>TUBB1</i>  | <i>U2AF1</i>  | <i>ZBTB33</i>  | <i>ZNF318</i> | <i>ZRSR2</i>  |               |

Table S2: CH Variant Details

| UPN    | Cohort          | Gene   | HGVSg                | HGVSp                                 | Consequence        | VAF (%) |
|--------|-----------------|--------|----------------------|---------------------------------------|--------------------|---------|
| 006-13 | post-transplant | BCORL1 | chrX:g.129159291A>G  | ENSP00000437775.1:p.Lys1339Glu        | missense_variant   | 0.7     |
| 006-13 | post-transplant | ATM    | chr11:g.108216546G>A | ENSP00000278616.4:p.Arg2832His        | missense_variant   | 8.82    |
| 006-26 | post-transplant | SRCAP  | chr16:g.30718896del  | ENSP00000262518.4:p.Val166CysfsTer4   | frameshift_variant | 2.75    |
| 006-30 | post-transplant | SF3B1  | chr2:g.198266834T>C  | ENSP00000335321.5:p.Lys700Glu         | missense_variant   | 2.09    |
| 006-30 | post-transplant | KDM6A  | chrX:g.44942752G>C   | ENSP00000367203.4:p.Arg1111Pro        | missense_variant   | 1.05    |
| 006-30 | post-transplant | ZBTB33 | chrX:g.119388871C>G  | ENSP00000314153.2:p.Ala534Gly         | missense_variant   | 15.83   |
| 006-30 | post-transplant | PPM1D  | chr17:g.58740525del  | ENSP00000306682.2:p.Asn477IlefsTer6   | frameshift_variant | 11      |
| 006-30 | post-transplant | SRSF2  | chr17:g.74733073A>T  | ENSP00000376276.2:p.Phe57Tyr          | missense_variant   | 20      |
| 006-52 | post-transplant | DNMT3A | chr2:g.25457266T>C   | ENSP00000264709.3:p.Tyr874Cys         | missense_variant   | 3.8     |
| 006-52 | post-transplant | TP53   | chr17:g.7577120C>T   | ENSP00000269305.4:p.Arg273His         | missense_variant   | 11.69   |
| 006-74 | post-transplant | SRCAP  | chr16:g.30740326C>T  | ENSP00000262518.4:p.Arg1900Cys        | missense_variant   | 2.5     |
| 007-02 | post-transplant | DNMT3A | chr2:g.25470545A>G   | ENSP00000264709.3:p.Ile310Thr         | missense_variant   | 1.41    |
| 007-36 | post-transplant | DNMT3A | chr2:g.25505528G>A   | ENSP00000264709.3:p.Ser77Phe          | missense_variant   | 0.6     |
| 007-36 | post-transplant | SRCAP  | chr16:g.30735967G>T  | ENSP00000262518.4:p.Gly1741Val        | missense_variant   | 0.48    |
| 007-36 | post-transplant | TP53   | chr17:g.7578401G>T   | ENSP00000269305.4:p.Pro177Thr         | missense_variant   | 0.5     |
| 007-36 | post-transplant | STAT3  | chr17:g.40474309C>A  | ENSP00000264657.4:p.Asp698Tyr         | missense_variant   | 1.33    |
| 007-36 | post-transplant | PPM1D  | chr17:g.58740525del  | ENSP00000306682.2:p.Asn477IlefsTer6   | frameshift_variant | 1.61    |
| 007-48 | post-transplant | TP53   | chr17:g.7578479G>T   | ENSP00000269305.4:p.Pro151Thr         | missense_variant   | 2.84    |
| 008-07 | post-transplant | DNMT3A | chr2:g.25467491C>T   | ENSP00000264709.3:p.Asp529Asn         | missense_variant   | 0.94    |
| 008-28 | post-transplant | SMC1A  | chrX:g.53432558A>G   | ENSP00000323421.3:p.Leu593Pro         | missense_variant   | 1.2     |
| 008-34 | post-transplant | ATM    | chr11:g.108117798C>T | ENSP00000278616.4:p.Arg337Cys         | missense_variant   | 18.52   |
| 008-40 | post-transplant | BCORL1 | chrX:g.129189835C>A  | ENSP00000437775.1:p.Cys1620Ter        | stop_gained        | 3.59    |
| 008-40 | post-transplant | PPM1D  | chr17:g.58740383del  | ENSP00000306682.2:p.Val430Ter         | frameshift_variant | 2.94    |
| 008-40 | post-transplant | ASXL1  | chr20:g.31024320del  | ENSP00000364839.4:p.Ser1269ArgfsTer11 | frameshift_variant | 0.75    |
| 008-40 | post-transplant | CEBPB  | chr20:g.48808127G>T  | ENSP00000305422.3:p.Arg186Leu         | missense_variant   | 0.84    |
| 008-57 | post-transplant | PPM1D  | chr17:g.58740444del  | ENSP00000306682.2:p.Leu450Ter         | frameshift_variant | 2.13    |
| 008-62 | post-transplant | DNMT3A | chr2:g.25470022A>T   | ENSP00000264709.3:p.Cys340Ter         | stop_gained        | 3.23    |
| 008-62 | post-transplant | SMC1A  | chrX:g.53432009G>C   | ENSP00000323421.3:p.Arg711Gly         | missense_variant   | 7.04    |
| 008-62 | post-transplant | ATM    | chr11:g.108121531C>T | ENSP00000278616.4:p.Arg447Ter         | stop_gained        | 15.32   |
| 008-62 | post-transplant | ATM    | chr11:g.108224595G>C | ENSP00000278616.4:p.Gly2925Ala        | missense_variant   | 4.11    |
| 008-77 | post-transplant | DNMT3A | chr2:g.25464544C>T   | ENSP00000264709.3:p.Val657Met         | missense_variant   | 7.52    |
| 008-77 | post-transplant | ATM    | chr11:g.108196887G>C | ENSP00000278616.4:p.Glu2304Gln        | missense_variant   | 1.5     |
| 008-77 | post-transplant | ASXL1  | chr20:g.31021439G>T  | ENSP00000364839.4:p.Glu480Ter         | stop_gained        | 4.07    |
| 009-40 | post-transplant | DNMT3A | chr2:g.25462022C>A   | ENSP00000264709.3:p.Trp795Cys         | missense_variant   | 1.45    |
| 009-40 | post-transplant | DNMT3A | chr2:g.25464568C>A   | ENSP00000264709.3:p.Val649Leu         | missense_variant   | 1.02    |

Table S2: CH Variant details (continued)

| UPN    | Cohort          | Gene   | HGVSg                         | HGVSp                                 | Consequence                       | VAF (%) |
|--------|-----------------|--------|-------------------------------|---------------------------------------|-----------------------------------|---------|
| 009-40 | post-transplant | DNMT3A | chr2:g.25469028C>T            | NA                                    | splice_donor_variant              | 0.49    |
| 009-40 | post-transplant | DNMT3A | chr2:g.25469489C>A            | ENSP00000264709.3:p.Glu427Ter         | stop_gained&splice_region_variant | 2.35    |
| 009-45 | post-transplant | SF3B1  | chr2:g.198266611C>T           | ENSP00000335321.5:p.Gly742Asp         | splice_region_variant             | 2.11    |
| 009-45 | post-transplant | PPM1D  | chr17:g.58740633T>A           | ENSP00000306682.2:p.Leu513Ter         | stop_gained                       | 9.43    |
| 010-03 | post-transplant | DNMT3A | chr2:g.25469129del            | ENSP00000264709.3:p.Glu444ArgfsTer207 | frameshift_variant                | 2.73    |
| 010-03 | post-transplant | ZNF318 | chr6:g.43325336del            | ENSP00000354964.2:p.His239LeufsTer42  | frameshift_variant                | 1.65    |
| 010-25 | post-transplant | RUNX1  | chr21:g.36252869C>T           | ENSP00000300305.3:p.Gly165Ser         | missense_variant                  | 6.01    |
| 010-50 | post-transplant | PPM1D  | chr17:g.58740502del           | ENSP00000306682.2:p.Asp470IlefsTer13  | frameshift_variant                | 2.8     |
| 011-42 | post-transplant | ATM    | chr11:g.108199871A>C          | ENSP00000278616.4:p.Met2405Leu        | missense_variant                  | 2.3     |
| 011-42 | post-transplant | ASXL1  | chr20:g.31024609G>T           | ENSP00000364839.4:p.Gly1365Val        | missense_variant                  | 0.56    |
| 011-76 | post-transplant | DNMT3A | chr2:g.25466787A>C            | ENSP00000264709.3:p.Leu639Arg         | missense_variant                  | 21.97   |
| 011-76 | post-transplant | DNMT3A | chr2:g.25471070G>A            | ENSP00000264709.3:p.Gln231Ter         | stop_gained                       | 0.95    |
| 011-76 | post-transplant | PPM1D  | chr17:g.58740756dup           | ENSP00000306682.2:p.Ser556LysfsTer4   | frameshift_variant                | 5.59    |
| 013-23 | post-transplant | TP53   | chr17:g.7577538C>T            | ENSP00000269305.4:p.Arg248Gln         | missense_variant                  | 3.12    |
| 013-47 | post-transplant | DNMT3A | chr2:g.25457243G>A            | ENSP00000264709.3:p.Arg882Cys         | missense_variant                  | 6.91    |
| 013-47 | post-transplant | DNMT3A | chr2:g.25470464G>A            | ENSP00000264709.3:p.Ser337Leu         | missense_variant                  | 4.2     |
| 013-47 | post-transplant | DNMT3A | chr2:g.25470533C>T            | ENSP00000264709.3:p.Trp314Ter         | stop_gained                       | 0.99    |
| 013-47 | post-transplant | CXCL12 | chr10:g.44873264C>T           | ENSP00000379140.2:p.Arg119Gln         | missense_variant                  | 1.94    |
| 013-47 | post-transplant | SRCAP  | chr16:g.30723707T>G           | ENSP00000262518.4:p.Leu647Arg         | missense_variant                  | 1.52    |
| 013-47 | post-transplant | SRCAP  | chr16:g.30724931del           | ENSP00000262518.4:p.Gln798SerfsTer14  | frameshift_variant                | 2.79    |
| 013-47 | post-transplant | SRCAP  | chr16:g.30744990G>A           | ENSP00000262518.4:p.Gly2122Asp        | missense_variant                  | 0.64    |
| 013-50 | post-transplant | DNMT3A | chr2:g.25463289T>C            | ENSP00000264709.3:p.Tyr735Cys         | missense_variant                  | 1.9     |
| 013-50 | post-transplant | DNMT3A | chr2:g.25470535C>T            | ENSP00000264709.3:p.Trp313Ter         | stop_gained                       | 1.36    |
| 013-50 | post-transplant | TP53   | chr17:g.7577568C>T            | ENSP00000269305.4:p.Cys238Tyr         | missense_variant                  | 3.8     |
| 013-57 | post-transplant | ATM    | chr11:g.108139175C>T          | ENSP00000278616.4:p.Gln893Ter         | stop_gained                       | 2.74    |
| 013-58 | post-transplant | DNMT3A | chr2:g.25463578C>A            | ENSP00000264709.3:p.Asp702Tyr         | missense_variant                  | 3.96    |
| 013-58 | post-transplant | DNMT3A | chr2:g.25467204G>T            | ENSP00000264709.3:p.Cys557Ter         | stop_gained                       | 5.41    |
| 013-58 | post-transplant | PPM1D  | chr17:g.58740533_58740534insT | ENSP00000306682.2:p.Lys480IlefsTer9   | frameshift_variant                | 3.7     |
| 013-59 | post-transplant | CREBBP | chr16:g.3781420T>G            | ENSP00000262367.5:p.Ile1649Leu        | missense_variant                  | 25      |
| 013-60 | post-transplant | DNMT3A | chr2:g.25457185A>C            | ENSP00000264709.3:p.Leu901Arg         | missense_variant                  | 0.83    |
| 013-65 | post-transplant | TET2   | chr4:g.106156036dup           | ENSP00000442788.1:p.Thr313AsnfsTer18  | frameshift_variant                | 5.36    |
| 013-67 | post-transplant | DNMT3A | chr2:g.25469508del            | ENSP00000264709.3:p.Gly421AlafsTer230 | frameshift_variant                | 0.75    |
| 013-67 | post-transplant | ZNF318 | chr6:g.43320216T>C            | NA                                    | splice_acceptor_variant           | 2.86    |
| 015-01 | pre-transplant  | DNMT3A | chr2:g.25470459C>T            | NA                                    | splice_donor_variant              | 0.43    |
| 015-01 | pre-transplant  | TET2   | chr4:g.106164778C>T           | ENSP00000442788.1:p.Arg1216Ter        | stop_gained                       | 14.29   |
| 015-01 | pre-transplant  | PPM1D  | chr17:g.58740483del           | ENSP00000306682.2:p.Gly463ValfsTer2   | frameshift_variant                | 0.78    |

Table S2: CH Variant details (continued)

| UPN    | Cohort          | Gene   | HGVSg                          | HGVSp                                  | Consequence        | VAF (%) |
|--------|-----------------|--------|--------------------------------|----------------------------------------|--------------------|---------|
| 015-01 | post-transplant | TET2   | chr4:g.106164778C>T            | ENSP00000442788.1:p.Arg1216Ter         | stop_gained        | 13.89   |
| 015-01 | post-transplant | PPM1D  | chr17:g.58740483del            | ENSP00000306682.2:p.Gly463ValfsTer2    | frameshift_variant | 0.2     |
| 015-04 | post-transplant | DNMT3A | chr2:g.25463239A>C             | ENSP00000264709.3:p.Phe752Val          | missense_variant   | 1.32    |
| 015-04 | post-transplant | DNMT3A | chr2:g.25463299A>C             | ENSP00000264709.3:p.Phe732Val          | missense_variant   | 2.97    |
| 015-04 | post-transplant | DNMT3A | chr2:g.25463239A>C             | ENSP00000264709.3:p.Phe752Val          | missense_variant   | 0.3     |
| 015-04 | post-transplant | DNMT3A | chr2:g.25463299A>C             | ENSP00000264709.3:p.Phe732Val          | missense_variant   | 2.61    |
| 015-04 | pre-transplant  | DNMT3A | chr2:g.25463299A>C             | ENSP00000264709.3:p.Phe732Val          | missense_variant   | 0.18    |
| 015-05 | post-transplant | STAT3  | chr17:g.40474482T>A            | ENSP00000264657.4:p.Tyr640Phe          | missense_variant   | 0.88    |
| 015-05 | post-transplant | STAT3  | chr17:g.40474482T>A            | ENSP00000264657.4:p.Tyr640Phe          | missense_variant   | 1.24    |
| 015-07 | post-transplant | DNMT3A | chr2:g.25464478C>T             | ENSP00000264709.3:p.Gly679Arg          | missense_variant   | 0.27    |
| 015-07 | post-transplant | ZNF318 | chr6:g.43308158T>C             | ENSP00000354964.2:p.Glu1193Gly         | missense_variant   | 0.57    |
| 015-07 | pre-transplant  | DNMT3A | chr2:g.25470480C>T             | ENSP00000264709.3:p.Gly332Arg          | missense_variant   | 0.41    |
| 015-07 | post-transplant | DNMT3A | chr2:g.25470480C>T             | ENSP00000264709.3:p.Gly332Arg          | missense_variant   | 0.24    |
| 015-07 | pre-transplant  | DNMT3A | chr2:g.25464478C>T             | ENSP00000264709.3:p.Gly679Arg          | missense_variant   | 0.2     |
| 015-10 | pre-transplant  | DNMT3A | chr2:g.25457243G>A             | ENSP00000264709.3:p.Arg882Cys          | missense_variant   | 0.29    |
| 015-11 | post-transplant | IDH2   | chr15:g.90645517G>C            | ENSP00000331897.3:p.Arg36Gly           | missense_variant   | 0.71    |
| 015-12 | post-transplant | PPM1D  | chr17:g.58740697del            | ENSP00000306682.2:p.Phe534LeufsTer5    | frameshift_variant | 15      |
| 015-12 | post-transplant | PPM1D  | chr17:g.58740749C>T            | ENSP00000306682.2:p.Arg552Ter          | stop_gained        | 2.27    |
| 015-12 | post-transplant | PPM1D  | chr17:g.58740697del            | ENSP00000306682.2:p.Phe534LeufsTer5    | frameshift_variant | 37.84   |
| 015-12 | post-transplant | PPM1D  | chr17:g.58740697del            | ENSP00000306682.2:p.Phe534LeufsTer5    | frameshift_variant | 24.42   |
| 015-12 | pre-transplant  | PPM1D  | chr17:g.58740697del            | ENSP00000306682.2:p.Phe534LeufsTer5    | frameshift_variant | 9.29    |
| 015-12 | pre-transplant  | PPM1D  | chr17:g.58740749C>T            | ENSP00000306682.2:p.Arg552Ter          | stop_gained        | 0.92    |
| 015-12 | post-transplant | PPM1D  | chr17:g.58740749C>T            | ENSP00000306682.2:p.Arg552Ter          | stop_gained        | 0.75    |
| 015-12 | post-transplant | PPM1D  | chr17:g.58740749C>T            | ENSP00000306682.2:p.Arg552Ter          | stop_gained        | 1.16    |
| 015-13 | pre-transplant  | DNMT3A | chr2:g.25471058C>A             | ENSP00000264709.3:p.Glu235Ter          | stop_gained        | 2.02    |
| 015-16 | post-transplant | ZNF318 | chr6:g.43310556T>C             | ENSP00000354964.2:p.Gln1045Arg         | missense_variant   | 0.91    |
| 015-16 | post-transplant | TP53   | chr17:g.7577120_7577122dup     | ENSP00000269305.4:p.Arg273dup          | inframe_insertion  | 0.48    |
| 015-16 | post-transplant | ASXL1  | chr20:g.31021518_31021519del   | ENSP00000364839.4:p.Arg506AsnfsTer3    | frameshift_variant | 0.77    |
| 015-16 | pre-transplant  | ASXL1  | chr20:g.31021518_31021519del   | ENSP00000364839.4:p.Arg506AsnfsTer3    | frameshift_variant | 0.39    |
| 015-16 | pre-transplant  | ASXL1  | chr20:g.31023159del            | ENSP00000364839.4:p.Gln882LysfsTer4    | frameshift_variant | 0.36    |
| 015-16 | post-transplant | TFR2   | chr7:g.100218647G>A            | ENSP00000420525.1:p.His747Tyr          | missense_variant   | 0.26    |
| 015-16 | post-transplant | ASXL1  | chr20:g.31021518_31021519del   | ENSP00000364839.4:p.Arg506AsnfsTer3    | frameshift_variant | 0.76    |
| 015-16 | post-transplant | ASXL1  | chr20:g.31023159del            | ENSP00000364839.4:p.Gln882LysfsTer4    | frameshift_variant | 0.31    |
| 015-17 | post-transplant | SH2B3  | chr12:g.111856239_111856260del | ENSP00000345492.2:p.Pro97ArgfsTer93    | frameshift_variant | 15.58   |
| 015-17 | pre-transplant  | SH2B3  | chr12:g.111856239_111856260del | ENSP00000345492.2:p.Pro97ArgfsTer93    | frameshift_variant | 20.03   |
| 015-17 | post-transplant | SH2B3  | chr12:g.111856239_111856260del | ENSP00000345492.2:p.Pro97ArgfsTer93    | frameshift_variant | 16.05   |
| 015-19 | post-transplant | CREBBP | chr16:g.3779024_3779032del     | ENSP00000262367.5:p.Asn2006_Val2008del | inframe_deletion   | 0.2     |

Table S2: CH Variant details (continued)

| UPN    | Cohort          | Gene   | HGVSg                                              | HGVSp                                 | Consequence        | VAF (%) |
|--------|-----------------|--------|----------------------------------------------------|---------------------------------------|--------------------|---------|
| 015-19 | pre-transplant  | IDH2   | chr15:g.90630433A>G                                | ENSP00000331897.3:p.Met293Thr         | missense_variant   | 0.47    |
| 015-19 | post-transplant | IDH2   | chr15:g.90630433A>G                                | ENSP00000331897.3:p.Met293Thr         | missense_variant   | 0.16    |
| 015-24 | pre-transplant  | DNMT3A | chr2:g.25505449del                                 | ENSP00000264709.3:p.Ser105AlafsTer57  | frameshift_variant | 0.76    |
| 015-24 | post-transplant | PPM1D  | chr17:g.58740809C>T                                | ENSP00000306682.2:p.Arg572Ter         | stop_gained        | 2.77    |
| 015-24 | pre-transplant  | PPM1D  | chr17:g.58740809C>T                                | ENSP00000306682.2:p.Arg572Ter         | stop_gained        | 1.29    |
| 015-24 | post-transplant | DNMT3A | chr2:g.25505449del                                 | ENSP00000264709.3:p.Ser105AlafsTer57  | frameshift_variant | 0.23    |
| 015-25 | post-transplant | PPM1D  | chr17:g.58740809C>T                                | ENSP00000306682.2:p.Arg572Ter         | stop_gained        | 1.33    |
| 015-25 | pre-transplant  | ATRX   | chrX:g.76764032T>C                                 | ENSP00000362441.4:p.Met2426Val        | missense_variant   | 0.64    |
| 015-25 | pre-transplant  | PPM1D  | chr17:g.58740809C>T                                | ENSP00000306682.2:p.Arg572Ter         | stop_gained        | 1.12    |
| 015-26 | post-transplant | SETBP1 | chr18:g.42618495G>A                                | ENSP00000282030.5:p.Ser1349Asn        | missense_variant   | 1.32    |
| 015-32 | pre-transplant  | DNMT3A | chr2:g.25468136del                                 | ENSP00000264709.3:p.Cys514AlafsTer137 | frameshift_variant | 2.88    |
| 015-32 | post-transplant | TP53   | chr17:g.7578394T>C                                 | ENSP00000269305.4:p.His179Arg         | missense_variant   | 0.9     |
| 015-32 | pre-transplant  | TP53   | chr17:g.7578394T>C                                 | ENSP00000269305.4:p.His179Arg         | missense_variant   | 0.75    |
| 015-32 | post-transplant | DNMT3A | chr2:g.25468136del                                 | ENSP00000264709.3:p.Cys514AlafsTer137 | frameshift_variant | 0.5     |
| 015-33 | pre-transplant  | TET2   | chr4:g.106155891del<br>chr2:g.25463563_25463575del | ENSP00000442788.1:p.Thr265LeufsTer28  | frameshift_variant | 1.48    |
| 12022  | healthy         | DNMT3A | chr2:g.25466800G>A                                 | ENSP00000264709.3:p.Leu703AlafsTer72  | frameshift_variant | 0.64    |
| 12022  | healthy         | DNMT3A | chr2:g.25466800G>A                                 | ENSP00000264709.3:p.Arg635Trp         | missense_variant   | 1.23    |
| 12022  | healthy         | DNMT3A | chr2:g.25470498G>A                                 | ENSP00000264709.3:p.Arg326Cys         | missense_variant   | 0.64    |
| 12022  | healthy         | DNMT3A | chr2:g.25470532C>T                                 | ENSP00000264709.3:p.Trp314Ter         | stop_gained        | 0.79    |
| 12022  | healthy         | DNMT3A | chr2:g.25470575A>T<br>chr6:g.43336727_43336764del  | ENSP00000264709.3:p.Leu300Gln         | missense_variant   | 0.69    |
| 12022  | healthy         | ZNF318 | chr6:g.43336727_43336764del                        | ENSP00000354964.2:p.Ala116ArgfsTer14  | frameshift_variant | 1.34    |
| 12022  | healthy         | SRCAP  | chr16:g.30733579del                                | ENSP00000262518.4:p.Ala1227LeufsTer77 | frameshift_variant | 0.46    |
| 12225  | healthy         | DNMT3A | chr2:g.25457242C>T                                 | ENSP00000264709.3:p.Arg882His         | missense_variant   | 1.18    |
| 12225  | healthy         | DNMT3A | chr2:g.25470532C>T                                 | ENSP00000264709.3:p.Trp314Ter         | stop_gained        | 0.53    |
| 12225  | healthy         | BRCC3  | chrX:g.154305470T>A                                | ENSP00000358474.1:p.Ile74Asn          | missense_variant   | 7.5     |
| 15189  | healthy         | DNMT3A | chr2:g.25463291del                                 | ENSP00000264709.3:p.Tyr735ThrfsTer44  | frameshift_variant | 10.56   |
| 16780  | healthy         | DNMT3A | chr2:g.25467125del                                 | ENSP00000264709.3:p.Tyr584ThrfsTer67  | frameshift_variant | 0.72    |
| 22996  | healthy         | ZNF318 | chr6:g.43333109del<br>chr12:g.111885238C>T         | ENSP00000354964.2:p.Phe157SerfsTer30  | frameshift_variant | 1.22    |
| 26710  | healthy         | SH2B3  | chr20:g.31022415_31022437del                       | ENSP00000345492.2:p.Gln376Ter         | stop_gained        | 1.54    |
| 26710  | healthy         | ASXL1  | chr20:g.31022415_31022437del                       | ENSP00000364839.4:p.Glu635ArgfsTer15  | frameshift_variant | 1.38    |
| 45268  | healthy         | DNMT3A | chr2:g.25463179del                                 | ENSP00000264709.3:p.Leu773SerfsTer6   | frameshift_variant | 1.02    |
| 45268  | healthy         | DNMT3A | chr2:g.25463587C>T                                 | ENSP00000264709.3:p.Gly699Ser         | missense_variant   | 2.61    |
| 45268  | healthy         | DNMT3A | chr2:g.25470498G>A                                 | ENSP00000264709.3:p.Arg326Cys         | missense_variant   | 0.53    |
| 47517  | healthy         | CUX1   | chr7:g.101844678A>G                                | ENSP00000353401.3:p.Asn712Asp         | missense_variant   | 0.48    |
| 57745  | healthy         | DNMT3A | chr2:g.25463229A>G                                 | ENSP00000264709.3:p.Phe755Ser         | missense_variant   | 2.39    |
| 57745  | healthy         | BRCC3  | chrX:g.154305494G>A                                | ENSP00000358474.1:p.Arg82His          | missense_variant   | 1.11    |
| 61170  | healthy         | DNMT3A | chr2:g.25463536C>T                                 | ENSP00000264709.3:p.Val716Ile         | missense_variant   | 1.18    |
| 61170  | healthy         | ZNF318 | chr6:g.43322770G>A                                 | ENSP00000354964.2:p.Gln768Ter         | stop_gained        | 0.64    |
| 61170  | healthy         | ZNF318 | chr6:g.43323138del                                 | ENSP00000354964.2:p.Cys645PhefsTer32  | frameshift_variant | 0.7     |

Table S2: CH Variant details (continued)

| UPN   | Cohort  | Gene    | HGVSg                                | HGVSp                                            | Consequence                                                        | VAF (%) |
|-------|---------|---------|--------------------------------------|--------------------------------------------------|--------------------------------------------------------------------|---------|
| 63781 | healthy | SMARCD2 | chr17:g.61914909C>T                  | ENSP00000392617.2:p.Gly98Asp                     | missense_variant                                                   | 1.99    |
| 63781 | healthy | GNAS    | chr20:g.57429095G>A                  | ENSP00000360141.3:p.Ala259Thr                    | missense_variant                                                   | 1.29    |
| 65530 | healthy | DNMT3A  | chr2:g.25463508C>T                   | NA                                               | splice_donor_variant                                               | 1.72    |
| 68786 | healthy | TET2    | chr4:g.106164913C>T                  | ENSP00000442788.1:p.Arg1261Cys                   | missense_variant<br>missense_variant&<br>splice_region_varia<br>nt | 10.91   |
| 70161 | healthy | RUNX1   | chr21:g.36231773C>T                  | ENSP00000300305.3:p.Arg204Gln                    | missense_variant                                                   | 1.77    |
| 73088 | healthy | ZBTB33  | chrX:g.119388636G>T                  | ENSP00000314153.2:p.Glu456Ter                    | stop_gained                                                        | 1.04    |
| 76283 | healthy | CUX1    | chr7:g.101870762G>C                  | ENSP00000353401.3:p.Glu1093Asp                   | missense_variant                                                   | 0.33    |
| 78691 | healthy | DNMT3A  | chr2:g.25458643_2545<br>8644insA     | ENSP00000264709.3:p.Lys844Ter                    | frameshift_variant                                                 | 1.65    |
| 78691 | healthy | DNMT3A  | chr2:g.25463291del                   | ENSP00000264709.3:p.Tyr735ThrfsTer44             | frameshift_variant                                                 | 0.58    |
| 87327 | healthy | ASXL1   | chr20:g.31024314_310<br>24323delinsT | ENSP00000364839.4:p.Thr1267_Arg1270d<br>elinsTer | stop_gained<br>splice_donor_varia<br>nt                            | 5.59    |
| 90221 | healthy | DNMT3A  | chr2:g.25469028C>T                   | NA                                               | missense_variant                                                   | 0.51    |
| 90221 | healthy | ASXL1   | chr20:g.31022581C>G                  | ENSP00000364839.4:p.Ser689Ter                    | stop_gained                                                        | 1.52    |
| 90221 | healthy | ASXL1   | chr20:g.31022922C>T                  | ENSP00000364839.4:p.Gln803Ter                    | stop_gained                                                        | 1.45    |
| 90221 | healthy | IL17RA  | chr22:g.17589215A>G                  | ENSP00000320936.6:p.Asp369Gly                    | missense_variant                                                   | 0.77    |
| 99830 | healthy | SETD2   | chr3:g.47103677del                   | ENSP00000386759.3:p.Gly2091GluTer56              | frameshift_variant                                                 | 2.37    |

UPN unique patient number; HGVS Human Genome Variant Society; VAF variant allele frequency

Table S3: Lung Transplant Recipient Clinical Characteristics by CH status

|                                         | No CH<br>(N=38) | Non-DDR CH<br>(N=23) | DDR CH<br>(N=24) |
|-----------------------------------------|-----------------|----------------------|------------------|
| Recipient Age, years, median (IQR)      | 55 (42-62)      | 62 (54-65)           | 66 (62-69)       |
| Recipient Female Sex, N(%)              | 14 (34.1)       | 13 (56.5)            | 10 (41.7)        |
| Recipient Race*, N(%)                   |                 |                      |                  |
| White                                   | 38 (92.7)       | 19 (82.6)            | 23 (95.8)        |
| Non-White                               | 3 (7.3)         | 4 (17.4)             | 1 (4.2)          |
| Transplant Diagnosis, N(%)              |                 |                      |                  |
| COPD                                    | 8 (21.1)        | 10 (43.5)            | 7 (29.2)         |
| ILD                                     | 18 (47.4)       | 10 (43.5)            | 16 (66.7)        |
| Other**                                 | 12 (31.6)       | 3 (13)               | 1 (4.2)          |
| Pre-Tx Cigarette Use, N(%)              | 22 (53.7)       | 14 (60.9)            | 19 (79.2)        |
| Pre-Tx Immunosuppression†, N(%)         | 11 (27.5)       | 7 (31.8)             | 9 (37.5)         |
| Mycophenolate                           | 6 (14.6)        | 4 (17.4)             | 2 (8.3)          |
| Azathioprine                            | 0 (0)           | 1 (4.3)              | 1 (4.2)          |
| Methotrexate                            | 2 (4.9)         | 0 (0)                | 0 (0)            |
| Rituximab                               | 1 (2.4)         | 1 (4.3)              | 0 (0)            |
| Chronic Steroids                        | 8 (19.5)        | 6 (26.1)             | 8 (33.3)         |
| Recipient CMV Positive, N(%)            | 21 (55.3)       | 10 (43.5)            | 16 (66.7)        |
| Transplant Type, N(%)                   |                 |                      |                  |
| Single                                  | 1 (2.4)         | 1 (4.3)              | 2 (8.3)          |
| Bilateral                               | 40 (97.6)       | 22 (95.7)            | 22 (91.7)        |
| Ischemic Time, minutes, median (IQR)    | 272 (227-335)   | 290 (241-321)        | 282 (221-346)    |
| Induction Therapy, (N(%)                |                 |                      |                  |
| Basiliximab                             | 26 (81.3)       | 15 (65.2)            | 21 (87.5)        |
| ATGAM                                   | 4 (12.5)        | 1 (4.3)              | 0 (0)            |
| Thymoglobulin                           | 2 (6.3)         | 7 (30.4)             | 3 (12.5)         |
| Anti-Proliferative Agent, N(%)          |                 |                      |                  |
| MPA Tolerant                            | 26 (63.4)       | 18 (78.3)            | 10 (41.7)        |
| MPA Intolerant                          | 15 (36.6)       | 5 (21.7)             | 14 (58.3)        |
| Maintenance Calcineurin Inhibitor, N(%) |                 |                      |                  |
| Tacrolimus                              | 41 (100)        | 23 (100)             | 23 (95.8)        |
| Cyclosporine                            | 0 (0)           | 0 (0)                | 0 (0)            |
| None                                    | 0 (0)           | 0 (0)                | 1 (4.2)          |

COPD: Chronic obstructive lung disease, ILD: interstitial lung disease, MPA: mycophenolic acid

\*Non-white: 7 Black/African American, 1 Asian. \*\*Other: 7 cystic fibrosis, 3 Alpha-1 antitrypsin, 3 pulmonary hypertension, 1 sarcoid, 1 non-CF bronchiectasis, 1 Other

†Totals for each agent exceed total number of patients as many patients were on multiple immunosuppression agents simultaneously

Table S4: Genes Reviewed on Whole Exome Sequencing

|                                    |                |                |               |               |                |
|------------------------------------|----------------|----------------|---------------|---------------|----------------|
| <i>ABCA3</i>                       | <i>ACD</i>     | <i>ANKRD26</i> | <i>AP3B1</i>  | <i>ATG2B</i>  | <i>ATM</i>     |
| <i>ATR</i>                         | <i>BLM</i>     | <i>BRCA1</i>   | <i>BRCA2</i>  | <i>BRIP1</i>  | <i>CBL</i>     |
| <i>CEBPA</i>                       | <i>CFTR</i>    | <i>CHEK2</i>   | <i>COPA</i>   | <i>CTC1</i>   | <i>DDX41</i>   |
| <i>DKC1</i>                        | <i>DNAJC21</i> | <i>EFL1</i>    | <i>ELANE</i>  | <i>EPCAM</i>  | <i>ERCC6L2</i> |
| <i>ETV6</i>                        | <i>FAM111B</i> | <i>FANCA</i>   | <i>FANCB</i>  | <i>FANCC</i>  | <i>FANCD2</i>  |
| <i>FANCE</i>                       | <i>FANCF</i>   | <i>FANCG</i>   | <i>FANCI</i>  | <i>FANCL</i>  | <i>FANCM</i>   |
| <i>G6PC3</i>                       | <i>GATA1</i>   | <i>GATA2</i>   | <i>GBA</i>    | <i>GFI1</i>   | <i>GSKIP</i>   |
| <i>HAX1</i>                        | <i>HPS1</i>    | <i>HPS4</i>    | <i>KRAS</i>   | <i>LIG4</i>   | <i>MAD2L2</i>  |
| <i>MARS1</i>                       | <i>MBD4</i>    | <i>MLH1</i>    | <i>MLH2</i>   | <i>MSH6</i>   | <i>NAF1</i>    |
| <i>NF1</i>                         | <i>NHP2</i>    | <i>NKX2-1</i>  | <i>NOP10</i>  | <i>PALB2</i>  | <i>PARN</i>    |
| <i>PMS2</i>                        | <i>POT1</i>    | <i>PPM1D</i>   | <i>PTPN11</i> | <i>RAD51C</i> | <i>RNF168</i>  |
| <i>RPA1</i>                        | <i>RPL11</i>   | <i>RPL15</i>   | <i>RPL23</i>  | <i>RPL26</i>  | <i>RPL27</i>   |
| <i>RPL31</i>                       | <i>RPL35A</i>  | <i>RPL5</i>    | <i>RPS10</i>  | <i>RPS24</i>  | <i>RPS26</i>   |
| <i>RPS27</i>                       | <i>RPS28</i>   | <i>RPS29</i>   | <i>RPS7</i>   | <i>RTEL1</i>  | <i>RUNX1</i>   |
| <i>SAMD9</i>                       | <i>SAMD9L</i>  | <i>SBDS</i>    | <i>SFTPA1</i> | <i>SFTPA2</i> | <i>SFTPC</i>   |
| <i>SMPD1</i>                       | <i>SRP72</i>   | <i>STING1</i>  | <i>STN1</i>   | <i>TEN1</i>   | <i>TERF1</i>   |
| <i>TERF2</i>                       | <i>TERF2IP</i> | <i>TERT</i>    | <i>TINF2</i>  | <i>TP53</i>   | <i>TSR2</i>    |
| <i>UBE2T</i>                       | <i>USB1</i>    | <i>WRAP53</i>  | <i>XPC</i>    | <i>XRCC2</i>  | <i>ZCCHC8</i>  |
| <i>rs35705950 (MUC5B promoter)</i> |                |                |               |               |                |

Table S5: Germline Variants with Pathogenic or Uncertain Significance

| ID     | Diagnosis | Age | Gene   | Variant                                       |
|--------|-----------|-----|--------|-----------------------------------------------|
| 013-65 | ILD       | 48  | RTEL1  | ENST00000370018.7:exon24:c.G2105A:p.Arg702His |
|        |           |     | TERT   | ENST00000310581.9:exon5:c.C2092T:p.Arg698Trp  |
| 008-57 | HP        | 56  | RTEL1  | ENST00000370018.7:exon14:c.C1189G:p.Gln397Glu |
| 015-03 | ILD       | 60  | RTEL1  | ENST00000370018.7:exon23:c.T1955C:p.Met652Thr |
| 013-59 | ILD       | 61  | PARN   | ENST00000341484.11:exon5:c.A89G:p.Tyr30Cys    |
| 009-04 | ILD       | 65  | TERT   | ENST00000310581.9:exon5:c.G2130T:p.Lys710Asn  |
| 008-40 | COPD      | 65  | TERT   | ENST00000310581.9:exon4:c.C1880G:p.Pro627Arg  |
| 015-15 | HP        | 64  | RTEL1  | ENST00000370018.7:exon30:c.G2903C:p.Cys968Ser |
| 015-34 | ILD       | 75  | RTEL1  | ENST00000370018.7:exon7:c.A540T:p.Glu180Asp   |
| 010-25 | ILD       | 68  | TERT   | ENST00000310581.9:exon2:c.C1396T:p.Arg466Trp  |
| 010-20 | ILD       | 59  | PARN   | ENST00000539279.5:exon10:c.A626G:p.Tyr209Cys  |
| 015-25 | ILD       | 63  | SFTPC  | ENST00000522109.5:exon3:c.G299T:p.Gly100Val   |
| 009-08 | ILD       | 43  | SFTPA2 | ENST00000372327.9:exon5:c.G633T:p.Trp211Cys   |
| 006-26 | ILD       | 49  | SFTPA1 | ENST00000428376.6:exon5:c.G725A:p.Arg242Gln   |
| 008-34 | ILD, MDS  | 68  | DDX41  | ENST00000625286.1:exon1:c.G3A:p.Met1Ile       |
